# Supplementary material for: Rapid, microwave-assisted deposition of anisotropic silver nanostructures on various substrates
Source: Royal Society of Chemistry journal article supplement (doi:10.1039/d4ra03132f), 2024-01-01
Supplement: d4ra03132f1.pdf [file d4ra03132f1.pdf]

## Rapid, microwave-assisted deposition of anisotropic silver nanostructures on various substrates

K. S. Choudhari<sup>a</sup>, S. A. Shivashankar<sup>b</sup> and Suresh D. Kulkarni<sup>a\*</sup>

<sup>a</sup>Department of Atomic and Molecular Physics, Manipal Academy of Higher Education, Manipal, Karnataka, India-576104

<sup>b</sup>Centre for Nano Science and Engineering, Indian Institute of Science, Bangalore, India-560012

\*Corresponding Author email: suresh.dk@manipal.edu

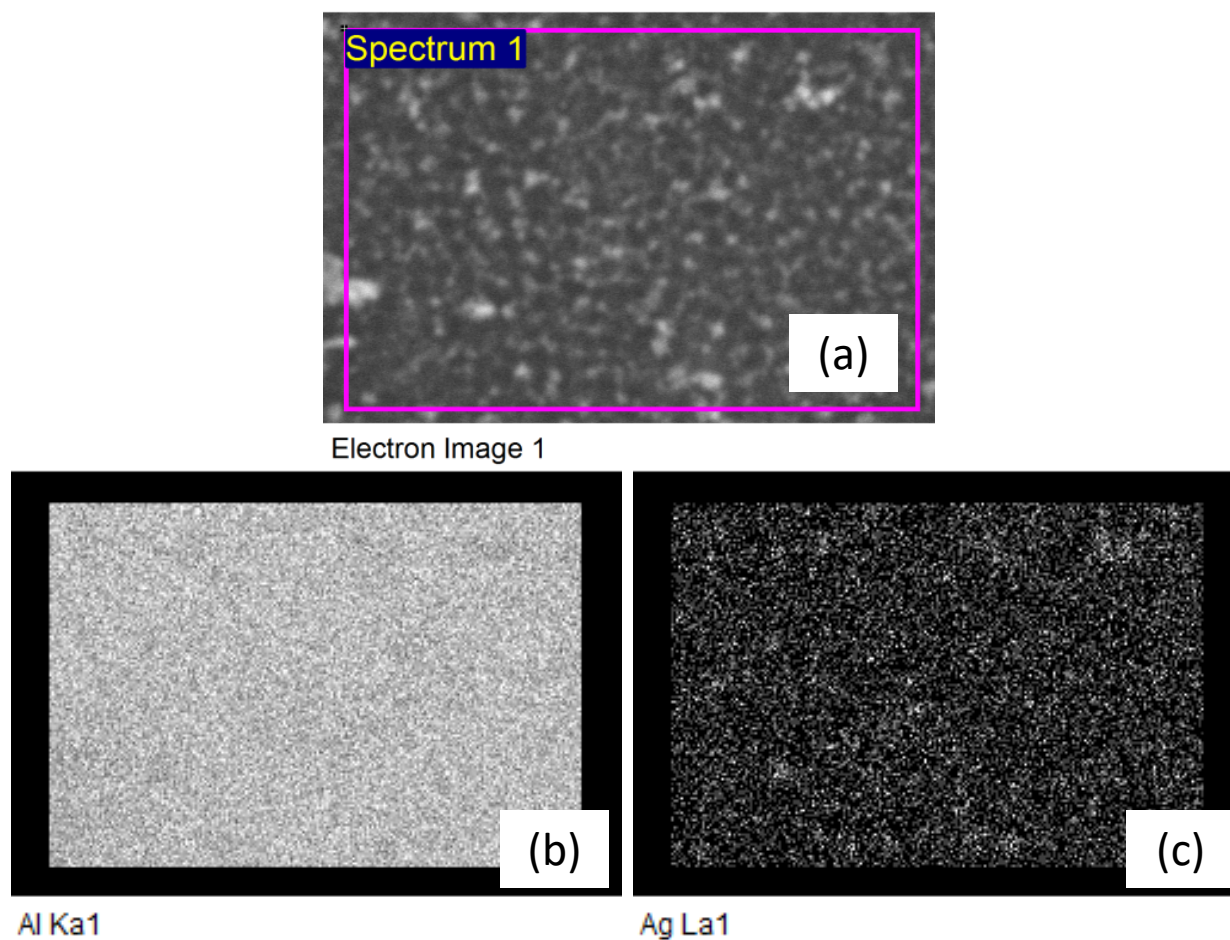

Fig S1. (a) FESEM micrograph of Nano-patterned aluminum and (b-c) its two-dimensional elemental maps for showing the distribution of Aluminum and Silver, respectively.
